# Supplementary material for: Skin Autofluorescence–Indicated Advanced Glycation End Products as Predictors of Cardiovascular and All‐Cause Mortality in High‐Risk Subjects: A Systematic Review and Meta‐analysis
Source: PubMed Central journal article supplement — J Am Heart Assoc. 2018 Sep 7;7(18):e009833. doi: 10.1161/JAHA.118.009833 (PMC6222966; doi:10.1161/jaha.118.009833), 2018-09-07
Supplement: JAH3-7-e009833-s001.pdf [file JAH3-7-e009833-s001.pdf]

# **SUPPLEMENTAL MATERIAL**

**Table S1. Search strategy for MEDLINE.**

|                                                                                                                         |            |                                                                                                                                                                       |            |                                                                                                                                                                                                                                                                                             |
|-------------------------------------------------------------------------------------------------------------------------|------------|-----------------------------------------------------------------------------------------------------------------------------------------------------------------------|------------|---------------------------------------------------------------------------------------------------------------------------------------------------------------------------------------------------------------------------------------------------------------------------------------------|
| <p>“Skin<br/>Autofluorescence”</p> <p>OR</p> <p>Fluorescence</p> <p>OR</p> <p>Autofluorescence</p> <p>OR</p> <p>SAF</p> | <p>AND</p> | <p>"Tissue advanced glycation<br/>end products"</p> <p>OR</p> <p>"Advanced Glycosylation End<br/>Products"</p> <p>OR</p> <p>"Advanced Glycation End<br/>Products"</p> | <p>AND</p> | <p>Cardiovascular</p> <p>OR</p> <p>Mortality</p> <p>OR</p> <p>"all-cause mortality"</p> <p>OR</p> <p>"cardiovascular<br/>mortality"</p> <p>OR</p> <p>"cause-specific<br/>mortality"</p> <p>OR</p> <p>Death</p> <p>OR</p> <p>"cardiovascular death"</p> <p>OR</p> <p>"overall mortality"</p> |
|-------------------------------------------------------------------------------------------------------------------------|------------|-----------------------------------------------------------------------------------------------------------------------------------------------------------------------|------------|---------------------------------------------------------------------------------------------------------------------------------------------------------------------------------------------------------------------------------------------------------------------------------------------|

**Table S2. Covariates used for adjusting the data reported by the included studies.**

| <b>Reference</b>                  | <b>Covariates</b>                                                                                                                                                                                                    |
|-----------------------------------|----------------------------------------------------------------------------------------------------------------------------------------------------------------------------------------------------------------------|
| Arsov et al 2013 <sup>1</sup>     | Age, sex, pre-CVD, diabetes mellitus, hypertension, HbSAg, dialysis duration, hs-CRP, ICAM-1, SOD, MPO, albumin.                                                                                                     |
| de Vos et al 2014 <sup>2</sup>    | Age, sex, current smoking, weight status, diabetes mellitus, hypertension, lipid-lowering drugs, eGFR, pre-CVD.                                                                                                      |
| Fraser et al 2014 <sup>3</sup>    | Age, sex, pre-CVD, diabetes mellitus, hypertension, current smoking, BMI, central obesity, total-to-HDL cholesterol ratio, eGFR, uACR, hemoglobin.                                                                   |
| Gerrits et al 2012 <sup>4</sup>   | Age, albumin, diabetes mellitus, pre-CVD, renal replacement therapy, pulse pressure, hematocrit, serum phosphorus, PTH.                                                                                              |
| Kimura et al 2014 <sup>5</sup>    | Age, sex, dialysis duration, diabetes mellitus, carotid IMT, albumin, pentosidine, hs-CRP, pre-CVD.                                                                                                                  |
| Lutgers et al 2008 <sup>6</sup>   | Sex, pre-CVD.                                                                                                                                                                                                        |
| Meerwaldt et al 2005 <sup>7</sup> | Age, albumin, hs-CRP, diabetes mellitus, dialysis duration, dialysis duration, hemodialysis treatment, triglycerides, LDL, smoking, PTH.                                                                             |
| Meerwaldt et al 2007 <sup>8</sup> | Age, HbA1c, hypertension, hemodialysis treatment, triglycerides, pre-CVD, LDL.                                                                                                                                       |
| Nongnuch et al 2015 <sup>9</sup>  | Sex, Davies' score, dialysis duration, albumin, cholesterol, phosphate binder, ethnicity, pre-CVD, diabetes mellitus, mode of haemodialysis, Kt/v, dialysis duration, hs-CRP, urine output, $\beta$ 2 microglobulin. |
| Siripol et al 2015 <sup>10</sup>  | None.                                                                                                                                                                                                                |

---

Pre-CVD: preexisting cardiovascular diseases; HbSAg: hepatitis B surface antigen; hs-CRP: high-sensitivity C-reactive protein; ICAM-1: Intercellular Adhesion Molecule 1; SOD: superoxide dismutase; MPO: Myeloperoxidase; eGFR: estimated glomerular filtration rate; HDL: high density lipoprotein; uACR: albumin-to-creatinine ratio; PTH: parathyroid hormone; IMT: intima-media thickness; LDL: low density lipoprotein; HbA1c: glycated haemoglobin.

**Table S3. Study quality assessed by QUIPS tool.**

| Reference                         | Study Participation | Study Attrition | Prognostic Factor (PF) Measurement | Outcome Measurement | Study Confounding | Statistical Analysis and Reporting | Total |
|-----------------------------------|---------------------|-----------------|------------------------------------|---------------------|-------------------|------------------------------------|-------|
| Arsov et al 2013 <sup>1</sup>     | ●                   | ●               | ●                                  | ●                   | ●                 | ●                                  | ●     |
| de Vos et al 2014 <sup>2</sup>    | ●                   | ●               | ●                                  | ●                   | ●                 | ●                                  | ●     |
| Fraser et al 2014 <sup>3</sup>    | ●                   | ●               | ●                                  | ●                   | ●                 | ●                                  | ●     |
| Gerrits et al 2012 <sup>4</sup>   | ●                   | ●               | ●                                  | ●                   | ●                 | ●                                  | ●     |
| Kimura et al 2014 <sup>5</sup>    | ●                   | ●               | ●                                  | ●                   | ●                 | ●                                  | ●     |
| Lutgers et al 2008 <sup>6</sup>   | ●                   | ●               | ●                                  | ●                   | ●                 | ●                                  | ●     |
| Meerwaldt et al 2005 <sup>7</sup> | ●                   | ●               | ●                                  | ●                   | ●                 | ●                                  | ●     |
| Meerwaldt et al 2007 <sup>8</sup> | ●                   | ●               | ●                                  | ●                   | ●                 | ●                                  | ●     |
| Nongnuch et al 2015 <sup>9</sup>  | ●                   | ●               | ●                                  | ●                   | ●                 | ●                                  | ●     |
| Siripol et al 2015 <sup>10</sup>  | ●                   | ●               | ●                                  | ●                   | ●                 | ●                                  | ●     |

● : Low risk of bias      ● : Moderate risk of bias      ● : High risk of bias

**Table S4. Random effect metaregression model.**

| Covariate                   | Cardiovascular mortality |              |       |                | All-cause mortality |              |       |                |
|-----------------------------|--------------------------|--------------|-------|----------------|---------------------|--------------|-------|----------------|
|                             | Number of studies        | $\beta$ (SE) | p     | I <sup>2</sup> | Number of studies   | $\beta$ (SE) | p     | I <sup>2</sup> |
| Length of follow up (years) | 8                        | 0.18 (0.17)  | 0.340 | 14.0           | 7                   | -0.01 (0.32) | 0.985 | 49.4           |
| Male sex (%)                | 8                        | 0.00 (0.02)  | 0.998 | 27.0           | 7                   | 0.03 (0.01)  | 0.068 | 1.4            |
| Age (years)                 | 8                        | -0.01 (0.02) | 0.679 | 23.4           | 7                   | -0.02 (0.05) | 0.730 | 52.4           |
| Diabetes mellitus (%)       | 8                        | 0.01 (0.01)  | 0.136 | 0.0            | 7                   | 0.01 (0.01)  | 0.284 | 36.4           |
| BMI (kg/cm <sup>2</sup> )   | 7                        | -0.10 (0.10) | 0.383 | 3.0            | 5                   | -0.14 (0.12) | 0.307 | 21.8           |
| Current smoker (%)          | 7                        | -0.00 (0.01) | 0.813 | 27.4           | 6                   | 0.04 (0.03)  | 0.273 | 38.5           |
| Hypertension (%)            | 6                        | -0.01 (0.01) | 0.160 | 0.0            | 5                   | -0.02 (0.01) | 0.104 | 0.0            |
| Pre-CVD (%)                 | 6                        | -0.02 (0.03) | 0.553 | 6.0            | 6                   | 0.01 (0.03)  | 0.699 | 38.8           |
| Baseline SAFs (AU)          | 8                        | -0.20 (0.38) | 0.619 | 22.8           | 7                   | -0.47 (0.77) | 0.567 | 48.3           |
| hs-CRP (mg/L)               | 3                        | 0.04 (0.25)  | 0.885 | 61.8           | 4                   | 0.14 (0.09)  | 0.270 | 26.7           |
| SBP (mmHg)                  | 3                        | -0.07 (0.08) | 0.544 | 0.0            | 3                   | 0.06 (0.03)  | 0.335 | 0.0            |
| DBP (mmHg)                  | 3                        | 0.02 (0.04)  | 0.676 | 0.0            | 3                   | 0.01 (0.06)  | 0.827 | 69.2           |
| Haemoglobin (g/dL)          | 4                        | 0.02 (0.42)  | 0.960 | 20.9           | 4                   | -0.10 (0.36) | 0.805 | 58.7           |
| HbA1c (%)                   | 3                        | 0.50 (0.39)  | 0.419 | 0.0            | N/O                 | -            | -     | -              |
| Albumin (g/L)               | 3                        | -0.08 (0.17) | 0.720 | 42.6           | 4                   | -0.10 (0.08) | 0.322 | 16.8           |
| Creatinine (mg/dL)          | 4                        | -0.08 (0.09) | 0.454 | 31.1           | 3                   | 0.02 (0.15)  | 0.899 | 41.4           |
| Total cholesterol (mg/dL)   | 5                        | 0.01 (0.01)  | 0.532 | 44.2           | 5                   | 0.00 (0.02)  | 0.875 | 59.5           |
| LDL cholesterol (mg/dL)     | 3                        | -0.04 (0.05) | 0.537 | 7.0            | N/O                 | -            | -     | -              |
| Triglycerides (mg/dL)       | 4                        | -0.02 (0.04) | 0.640 | 59.7           | 3                   | 0.03 (0.13)  | 0.285 | 0.0            |

SE: standard error; BMI: body mass index; Pre-CVD: preexisting cardiovascular disease; AGES: advanced glycation end products; AU: arbitrary units; hs-CRP: high-sensitivity C-reactive protein; SBP: systolic blood pressure; DBP: diastolic blood pressure; HbA1c: glycated haemoglobin A1c; LDL: low density lipoprotein; N/O: not enough observations.

**Figure S1. Assessment of potential publication bias by Egger test.**

**A Cardiovascular mortality (p = 0.072)**

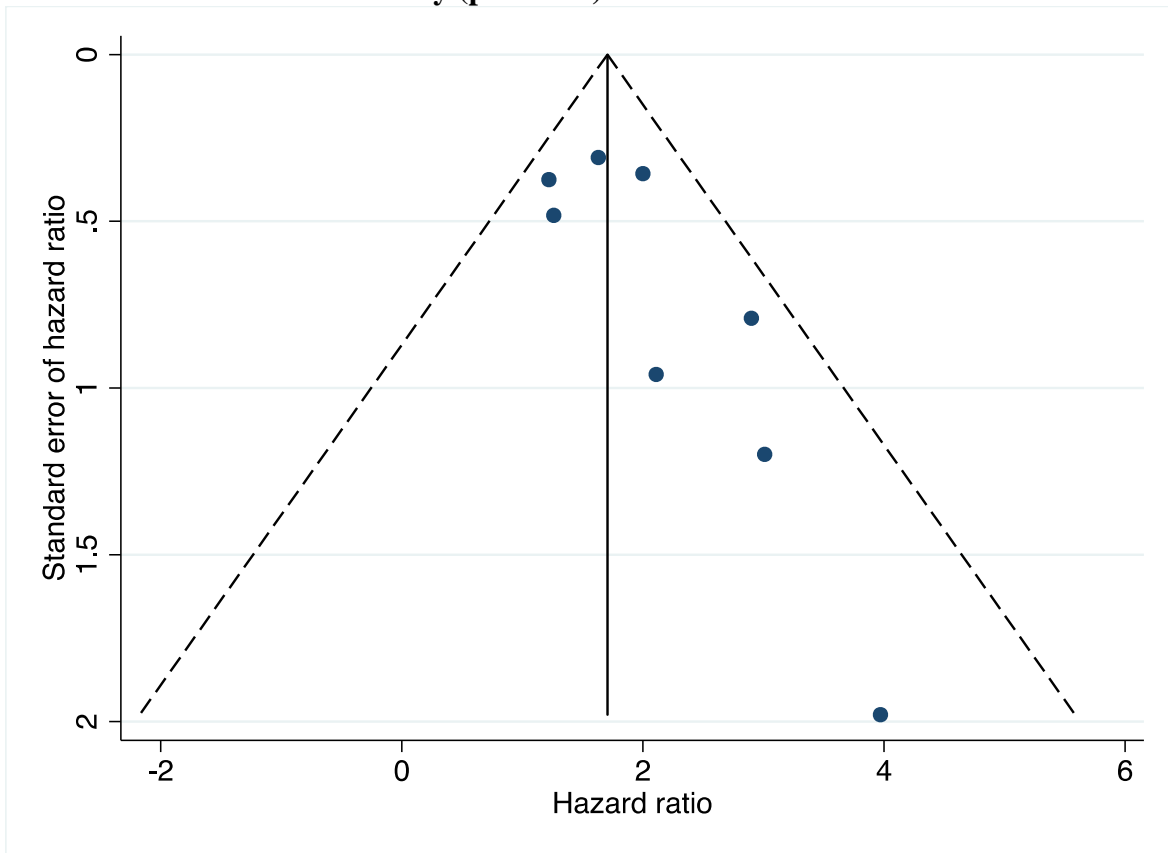

**B All-cause mortality (p = 0.007)**

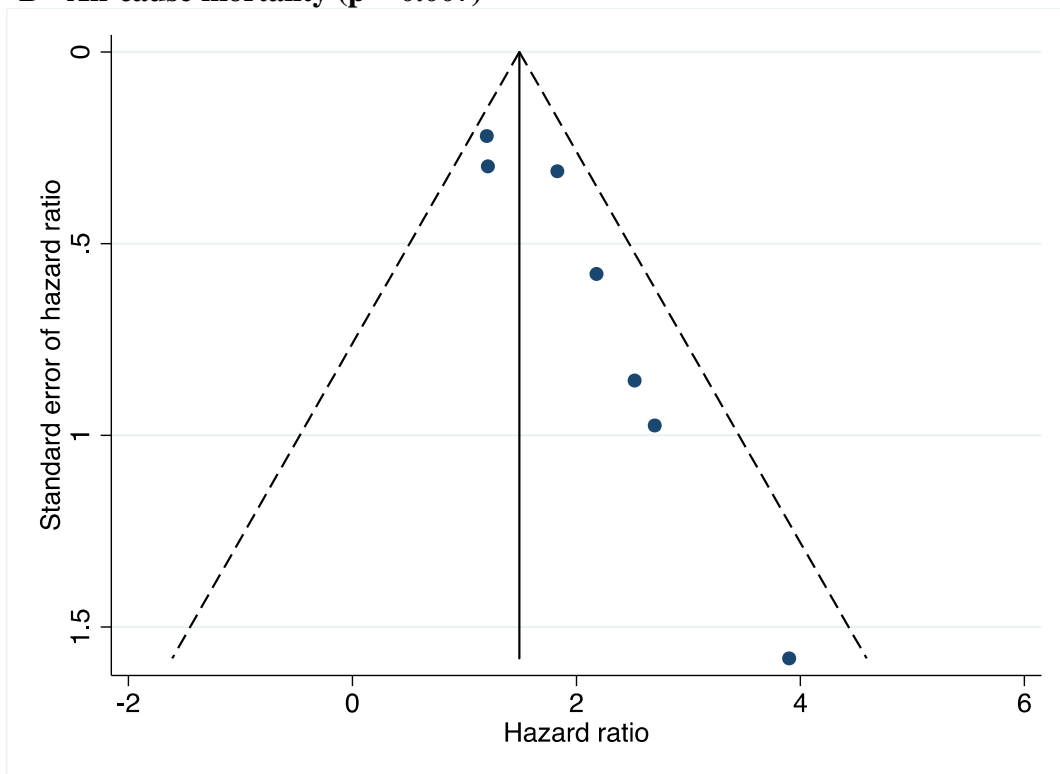

**Figure S2. Assessment of potential publication bias by Egger test post Trim and fill.**

**A Cardiovascular mortality (p = 0.96)**

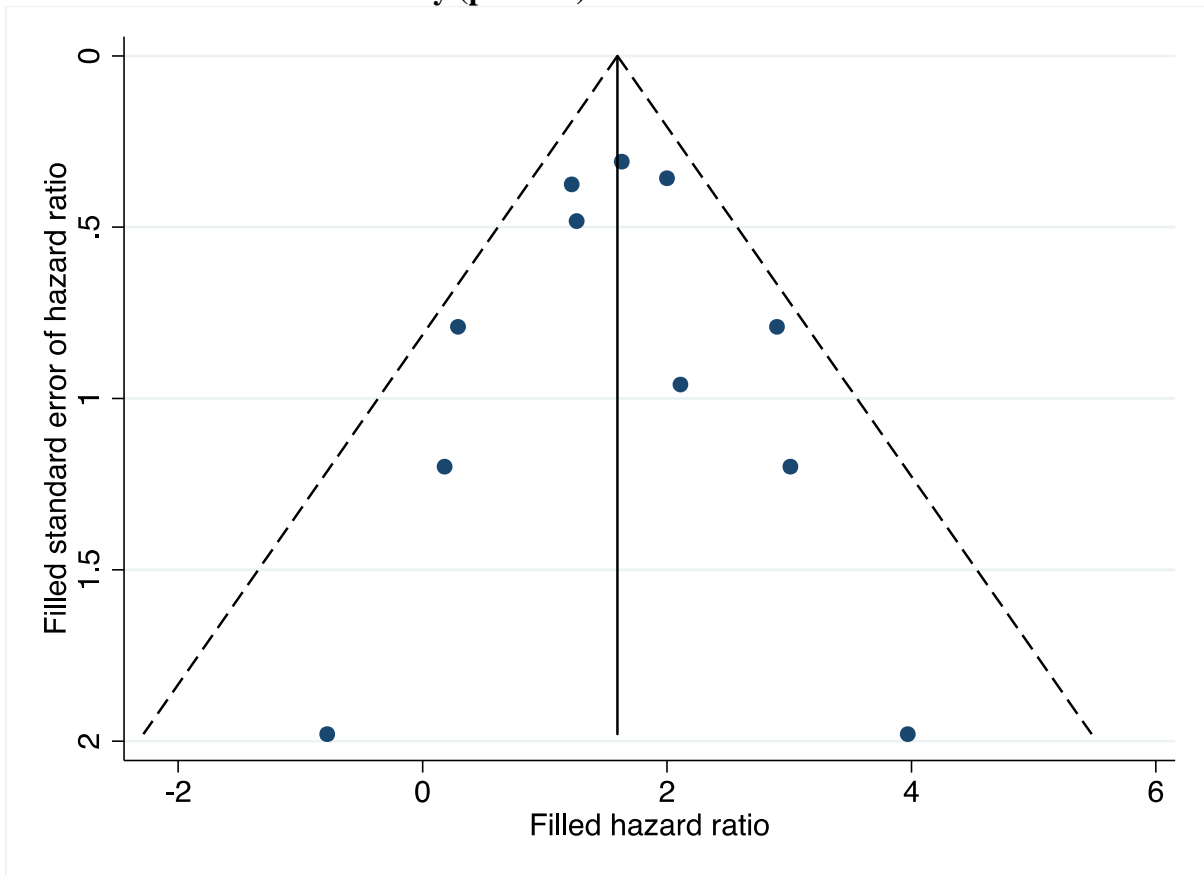

**B All-cause mortality (p = 0.698)**

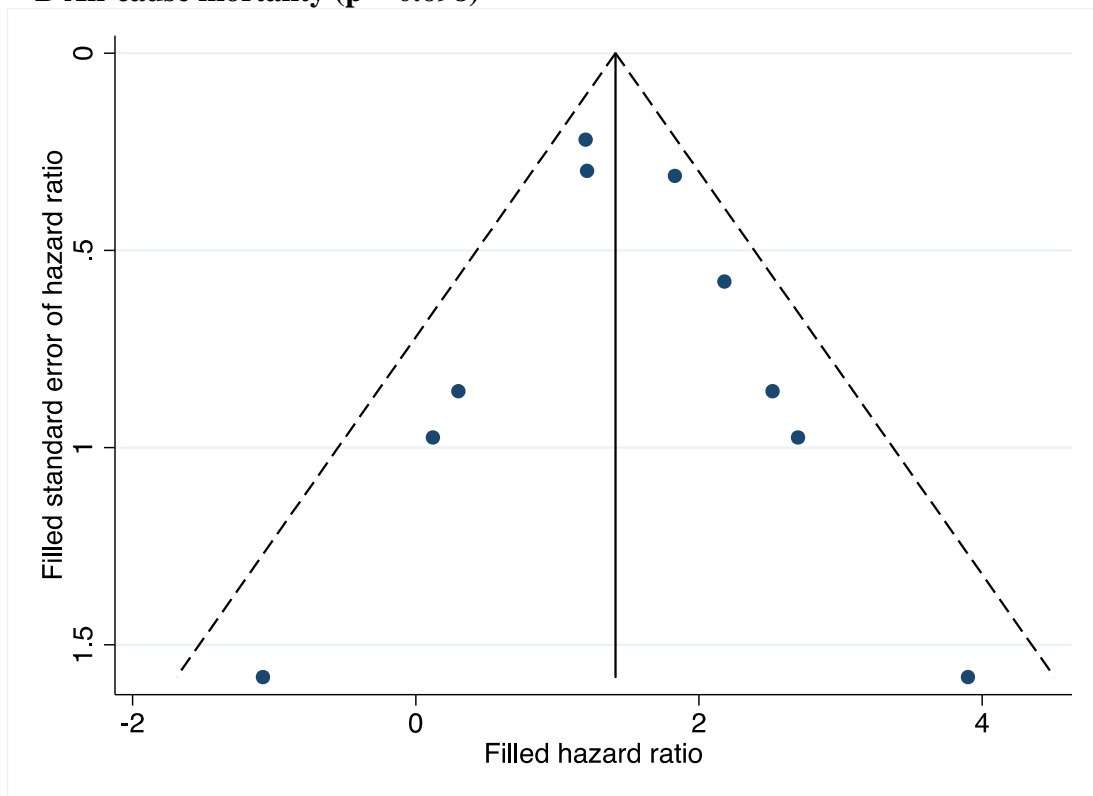

## Supplemental References:

1. Arsov S, Trajceska L, Oeveren W, Smit AJ, Dzekova P, Stegmayr B, Sikole A, Rakhorst G, Graaff R. Increase in Skin Autofluorescence and Release of Heart-Type Fatty Acid Binding Protein in Plasma Predicts Mortality of Hemodialysis Patients. *Artif Organs*. 2013;37:e114-e22.
2. de Vos LC, Mulder DJ, Smit AJ, Dullaart RP, Kleefstra N, Lijfering WM, Kamphuisen PW, Zeebregts CJ, Lefrandt JD. Skin autofluorescence is associated with 5-year mortality and cardiovascular events in patients with peripheral artery disease. *Arterioscler Thromb Vascular Biol*. 2014;34:933-938.
3. Fraser SD, Roderick PJ, McIntyre NJ, Harris S, McIntyre CW, Fluck RJ, Taal MW. Skin autofluorescence and all-cause mortality in stage 3 CKD. *Clin J Am Soc Nephrol*. 2014;9:1361-1368.
4. Gerrits EG, Lutgers HL, Smeets GH, Groenier KH, Smit AJ, Gans RO, Bilo HJ. Skin autofluorescence: a pronounced marker of mortality in hemodialysis patients. *Nephron Extra*. 2012;2:184-191.
5. Kimura H, Tanaka K, Kanno M, Watanabe K, Hayashi Y, Asahi K, Suzuki H, Sato K, Sakaue M, Terawaki H, Nakayama M, Miyata T, Watanabe T. Skin autofluorescence predicts cardiovascular mortality in patients on chronic hemodialysis. *Ther Apher Dial*. 2014;18:461-467.
6. Lutgers HL, Gerrits EG, Graaff R, Links TP, Sluiter WJ, Gans RO, Bilo HJ, Smit AJ. Skin autofluorescence provides additional information to the UK Prospective Diabetes Study (UKPDS) risk score for the estimation of cardiovascular prognosis in type 2 diabetes mellitus. *Diabetologia*. 2009;52:789-797.
7. Meerwaldt R, Hartog JW, Graaff R, Huisman RJ, Links TP, den Hollander NC, Thorpe SR, Baynes JW, Navis G, Gans RO, Smit AJ. Skin autofluorescence, a measure of cumulative metabolic stress and advanced glycation end products, predicts mortality in hemodialysis patients. *J Am Soc of Nephrol*. 2005;16:3687-3693.
8. Meerwaldt R, Lutgers HL, Links TP, Graaff R, Baynes JW, Gans RO, Smit AJ. Skin autofluorescence is a strong predictor of cardiac mortality in diabetes. *Diabetes care*. 2007; 30:107-112.
9. Nongnuch A, Davenport A. Skin autofluorescence advanced glycosylation end products as an independent predictor of mortality in high flux haemodialysis and haemodialysis patients. *Nephrology*. 2015;20:862-867.
10. Siriopol D, Hogas S, Veisa G, Mititiuc I, Volovat C, Apetrii M, Onofriescu M, Busila I, Oleniuc M, Covic A. Tissue advanced glycation end products (AGEs), measured by skin autofluorescence, predict mortality in peritoneal dialysis. *Int Urol Nephrol*. 2015;47:563-569.
